# COVID-19 mitigation measures in primary schools and association with infection and school staff wellbeing: an observational survey linked with routine data in Wales, UK

Emily Marchant<sup>1,2\*</sup>, Lucy Griffiths<sup>1</sup>, Tom Crick<sup>3</sup>, Richard Fry<sup>1,2</sup>, Joe Hollinghurst<sup>1</sup>, Michaela James<sup>1,2</sup>, Laura Cowley<sup>2,4</sup>, Hoda Abbasizanjani<sup>1</sup>, Fatemeh Torabi<sup>1</sup>, Dan Thompson<sup>1</sup>, Jonathan Kennedy<sup>1,2</sup>, Ashley Akbari<sup>1</sup>, Michael Gravenor<sup>1</sup>, Ronan A Lyons<sup>1</sup> and Sinead Brophy<sup>1,2</sup>

<sup>1</sup> Population Data Science, Medical School, Swansea University, Swansea, SA2 8PP, United Kingdom

<sup>2</sup> National Centre for Population Health and Wellbeing Research, Swansea University, Swansea, SA2 8PP, United Kingdom

<sup>3</sup> School of Education, Swansea University, Swansea, SA2 8PP, United Kingdom

<sup>4</sup> Research and Evaluation Division, Public Health Knowledge and Research Directorate, Public Health Wales, 2 Capital Quarter, Cardiff, CF10 4BZ, United Kingdom

\* Corresponding author: [E.K.Marchant@swansea.ac.uk](mailto:E.K.Marchant@swansea.ac.uk)

## Abstract

### Introduction

School-based COVID-19 mitigation strategies have greatly impacted the primary school day (children aged 3-11) including: wearing face coverings, 2-metre distancing, no mixing of children, and no breakfast clubs or extra-curricular activities. This study examines these mitigation methods and association with COVID-19 infection, respiratory infection, and school staff wellbeing between October to December 2020 in Wales, UK.

### Methods

A school staff survey captured self-reported COVID-19 mitigation measures in the school, participant anxiety and depression, and open-text responses regarding experiences of teaching and implementing measures. These survey responses were linked to national-scale COVID-19 test results data to examine association of measures in the school and the likelihood of a positive (staff or pupil) COVID-19 case in the school (clustered by school, adjusted for school size and free school meals using logistic regression). Linkage was conducted through the SAIL (*Secure Anonymised Information Linkage*) Databank.

### Results

Responses were obtained from 353 participants from 59 primary schools within 15 of 22 local authorities. Having more direct non-household contacts was associated with a higher likelihood of COVID-19 positive case in the school (1-5 contacts compared to none, OR 2.89 (1.01, 8.31)) and a trend to more self-reported cold symptoms. Staff face covering was not associated with a lower odds of school COVID-19 cases (mask vs. no covering OR 2.82 (1.11, 7.14)) and was associated with higher self-reported cold symptoms. School staff reported the

impacts of wearing face coverings on teaching, including having to stand closer to pupils and raise their voices to be heard. 67.1% were not able to implement 2-metre social distancing from pupils. We did not find evidence that maintaining a 2-metre distance was associated with lower rates of COVID-19 in the school.

## Conclusions

Implementing, adhering to and evaluating COVID-19 mitigation guidelines is challenging in primary school settings. Our findings suggest that reducing non-household direct contacts lowers infection rates. There was no evidence that face coverings, 2-metre social distancing or stopping children mixing was associated with lower odds of COVID-19 or cold infection rates in the school. Primary school staff found teaching challenging during COVID-19 restrictions, especially for younger learners and those with additional learning needs.

## Keywords

Primary school setting, school mitigation measures, COVID-19

## Introduction

The COVID-19 global pandemic caused by the transmission of severe acute respiratory syndrome coronavirus 2 (SARS-CoV-2) resulted in the temporary closure of educational settings worldwide [1]. Implemented worldwide from mid-April 2020, school closures were used as a public health measure to reduce social contacts and the risk of transmission amongst pupils, school staff, families and the wider community. However, recent evidence indicates that children below the age of 14 appear to have lower susceptibility to infection

and display fewer clinical symptoms [2–5]. Population-level data suggests that whilst transmission risks within school exists, risks are lower compared to within households [6]. Adults living with young children (0-11 years) during the period after schools reopened encountered no greater risk of COVID-19 infection [7], and school staff were at no greater risk of COVID-19 infection than other working-age adults [8].

Educational settings reopened for face-to-face teaching and learning from September to December 2020. In Wales, one of the four nations of the UK, education is a devolved responsibility of the Welsh Government. Operational guidance to schools in Wales in the 2020 autumn term [9] (1 September to 22 December) included widespread adaptation to social behaviours and a variety of school-based mitigation measures. This included encouraging wearing face coverings, reducing contacts, maintaining social distancing between pupils and staff, segregating classes and guidance on breakfast clubs, extra-curricular activities and outdoor learning [9].

Research examining the implementation of guidelines by schools highlights major challenges, including the ability of school staff to maintain a 2-metre distance from staff and pupils [10]. School staff highlight the conflict between balancing preventative measures with learning, with measures such as physical distancing policies negatively impacting on teaching quality. A rapid scoping review assessing the impacts of school-based measures concluded that there is an urgent need for research assessing the effectiveness of these measures on directly affected populations (e.g. pupils and school staff) [11], and on the psychosocial well-being and mental health of school populations. This is important as evidence suggests teacher wellbeing is a critical factor in creating stable environments for children to thrive [12] and is positively associated with academic achievement [13].

This study linked routinely collected COVID-19 polymerase chain reaction (PCR) test results data with survey data to examine the association between COVID-19 positive cases within the primary school setting and different school-based mitigation measures aligned to guidance, implemented between October to December 2020. Secondly, it examined these measures and school staff's self-reported (a) cold symptoms in the previous seven days, as a proxy for infection rates; and (b) levels of anxiety and depression.

## Methods

### Study design

This study adopted a mixed methods design. Participants were recruited through the HAPPEN primary school network (*Health and Attainment of Pupils in a Primary Education Network*)<sup>1</sup> [14] in September 2020. An online survey (open 9 October 2020 to 16 December 2020) with school staff captured self-reported implementation of school-based COVID-19 mitigation measures and individual level outcomes of cold symptoms and anxiety/depressive symptoms. The survey findings were linked with routine data on COVID-19 test results for staff and pupils within the respective school of the staff participant for the school-level outcome. Linkage was performed using the SAIL (*Secure Anonymised Information Linkage*) Databank [15,16]<sup>2</sup>. Data were linked at the individual level using the School Workforce Annual Census (SWAC) to assign each school staff to their school, and the Pupil Level Annual School Census (PLASC) to identify pupil by school and link COVID-19 test results to the appropriate school [17]. In addition, open-ended survey responses were used to examine views of school

---

<sup>1</sup> <https://happen-wales.co.uk/>

<sup>2</sup> <https://saildatabank.com/>

staff using a content analysis approach [18] [19]. The RECORD checklist [20] for this study is presented in Additional File 1.

## Ethics

Ethical approval was granted by the Swansea University Medical School Research Ethics Committee (2017-0033E). Information sheets and consent forms were distributed via email to participants detailing the aims of the study. To participate in the survey, primary school staff were required to provide written informed consent. All participants were able to withdraw from the research at any point. All participants were assigned a unique ID number, and any personal data such as names were removed. Electronic data (survey responses) were stored in password-protected files that were only accessible to the research team. The routine data used in this study are available in the SAIL Databank [21] and are subject to review by an independent Information Governance Review Panel (IGRP), to ensure proper and appropriate use of SAIL data. Before any data can be accessed, approval must be received from the IGRP. When access has been approved, it is accessed through a privacy-protecting safe haven and remote access system referred to as the SAIL Gateway. SAIL has established an application process to be followed by anyone who would like to access data via SAIL. This study has been approved by the SAIL IGRP (project reference: 0911).

## School staff survey and linked data

A convenience sample of primary school staff were recruited by contacting members of the HAPPEN network and directly emailing all primary schools in Wales, UK (n=1,203) in September 2020. The survey was promoted through existing partnerships with stakeholders

including regional education consortia groups. The online survey was open for responses from 9 October 2020 to 16 December 2020 (study period) when schools returned for face-to-face teaching. Inclusion criteria for participation was any primary school staff working within a local authority maintained (publicly funded) primary school. The development of the survey was based on input from the research team specialising in child health and education research (authors EM, MJ, SB), education stakeholders (regional education consortia curriculum staff) and a headteacher and teacher from two primary schools to ensure appropriate wording and usability. The final survey contained 41 questions consisting of demographic, categorical and open-ended questions. The survey included the validated questionnaires Generalized Anxiety Disorder (GAD-7) [22] and Patient Health Questionnaire (PHQ-9) [23] to assess the presence and severity of anxiety and depressive symptoms. The survey was conducted online and could be completed by a member of school staff at a convenient time via an electronic device including mobile phone, tablet, laptop and computer. Responses were downloaded to an Excel spreadsheet. Quantitative data responses were uploaded to the SAIL Databank [15,16] to be linked with COVID-19 school testing data [17], and analysed using Stata (version 16). A copy of the survey is presented in Additional File 1.

The process of data coding involved two researchers. The first researcher downloaded the raw data, cleaned the data, checked for duplicates, generated a unique participant ID number and removed identifiable information. This process protects participants' anonymity by ensuring that the second researcher conducting the analyses could not identify individuals. This coded dataset was uploaded to the SAIL Databank, a national data infrastructure asset of anonymised data about the population of Wales that enables secure data linkage and analysis for research. To link the data, the demographic data are separated from the survey data and sent to a trusted third party, Digital Health and Care Wales and the survey data goes

to SAIL using a secure file upload. A unique Anonymous Linking Field (ALF) is assigned to the person-based record before it is joined to clinical data via a system linking field. This dataset was accessible to authors listed from Population Data Science.

## Quantitative analysis

A COVID-19 school incident in Wales, UK, is defined as one or more positive COVID-19 cases in a school [24]. The primary outcome was the probability of at least one positive school-level COVID-19 test (pupils or staff) within the school setting linked to the staff participant during the study period. Secondary binary outcomes investigated at an individual level captured by the online survey were self-reported cold symptoms in the previous seven days (proxy of infection risk), moderate/severe anxiety (GAD-7) and moderate/severe depression (PHQ-9). Eligibility criteria within final analyses models were any primary school staff participant with complete linked survey and routine records. Participants contracted to multiple schools were excluded from analyses (n=3) (see Figure 1).

Logistic regression analyses adjusting for confounding variables (school size, proportion of pupils eligible for free school meals as an indicator for deprivation) and clustered by school determined the Odds Ratio (OR) at a school level for at least one positive linked COVID-19 test at the respective school during the study period and for individual-level (school staff) secondary outcomes.

All exposure measures relating to government guidance were captured through self-report by school staff via the online survey and were analysed in individual models and then in a combined model. Detail of exposures including survey item, grouping and coding can be found in Additional File 3. This study assumed self-reported mitigation measures to be in



effect for the duration of the study period based on operational guidance issued to schools at the time of the study [9].

## Qualitative analysis

Secondary qualitative content analysis was conducted to explore the impact of wearing face coverings on teaching, attained from item 29 (see Additional File 2). Content analysis aims to make contextual inferences of data by condensing text into related concepts to provide knowledge to describe a phenomenon [18]. Conceptual content analysis was chosen to quantify the frequency of reoccurring words/themes and offer a descriptive lens of the quantitative data in terms of the most significant impacts of wearing face coverings for school staff [25,26]. An inductive approach was used as knowledge of this subject is limited due to the new and rapidly evolving nature of the COVID-19 pandemic. The lead researcher (EM) followed the steps of preparation, organising and reporting outlined by Elo and Kyngäs [25].

During the preparation stage, words or sentences were chosen as the unit of analysis to represent related concepts. The lead researcher (EM) who was female and had previous experience in qualitative data analysis read the open-ended responses several times to facilitate immersion in the data [27] and to gain an understanding of ‘what is going on’ [28]. The use of memoing recorded notes of patterns and emerging insights relating to coding ideas. Thoughts relating to decision processes were documented in a reflexive journal [29,30]. In the case of inductive content analysis, an open coding process to organising the data was applied by manually assigning freely generated open codes, consisting of words and sentences representing key conceptual responses. The initial list of words and sentences were grouped under higher order headings [27], with each heading named using content-

characteristic words that describe the phenomenon [25]. The categories produced were discussed and reviewed with the research team to develop the final list of category headings characterising any impacts of face coverings on teaching. The researchers did not have any interaction with participants.

## Results

Responses were obtained from 353 participants from 59 primary schools located within 15 local authorities in Wales, UK (Table 1). A cohort flow diagram is presented in Figure 1. 87 (24.7%) participants had a linked COVID-19 positive test, 31 (8.8%) reported cold symptoms, 62 (17.6%) and 67 (19.0%) reported moderate/severe anxiety and depression respectively. Participants were removed from the regression analyses due to missing values for the following outcomes; cold symptoms outcomes (n=8), anxiety (n=49) and depression (n=125) (multivariable models). Missing values of exposure variables ranged from 0 to 19 (see Table 2). Complete case analyses are presented below. Sensitivity analyses where missing responses are coded as 0 are presented in Additional File 4.

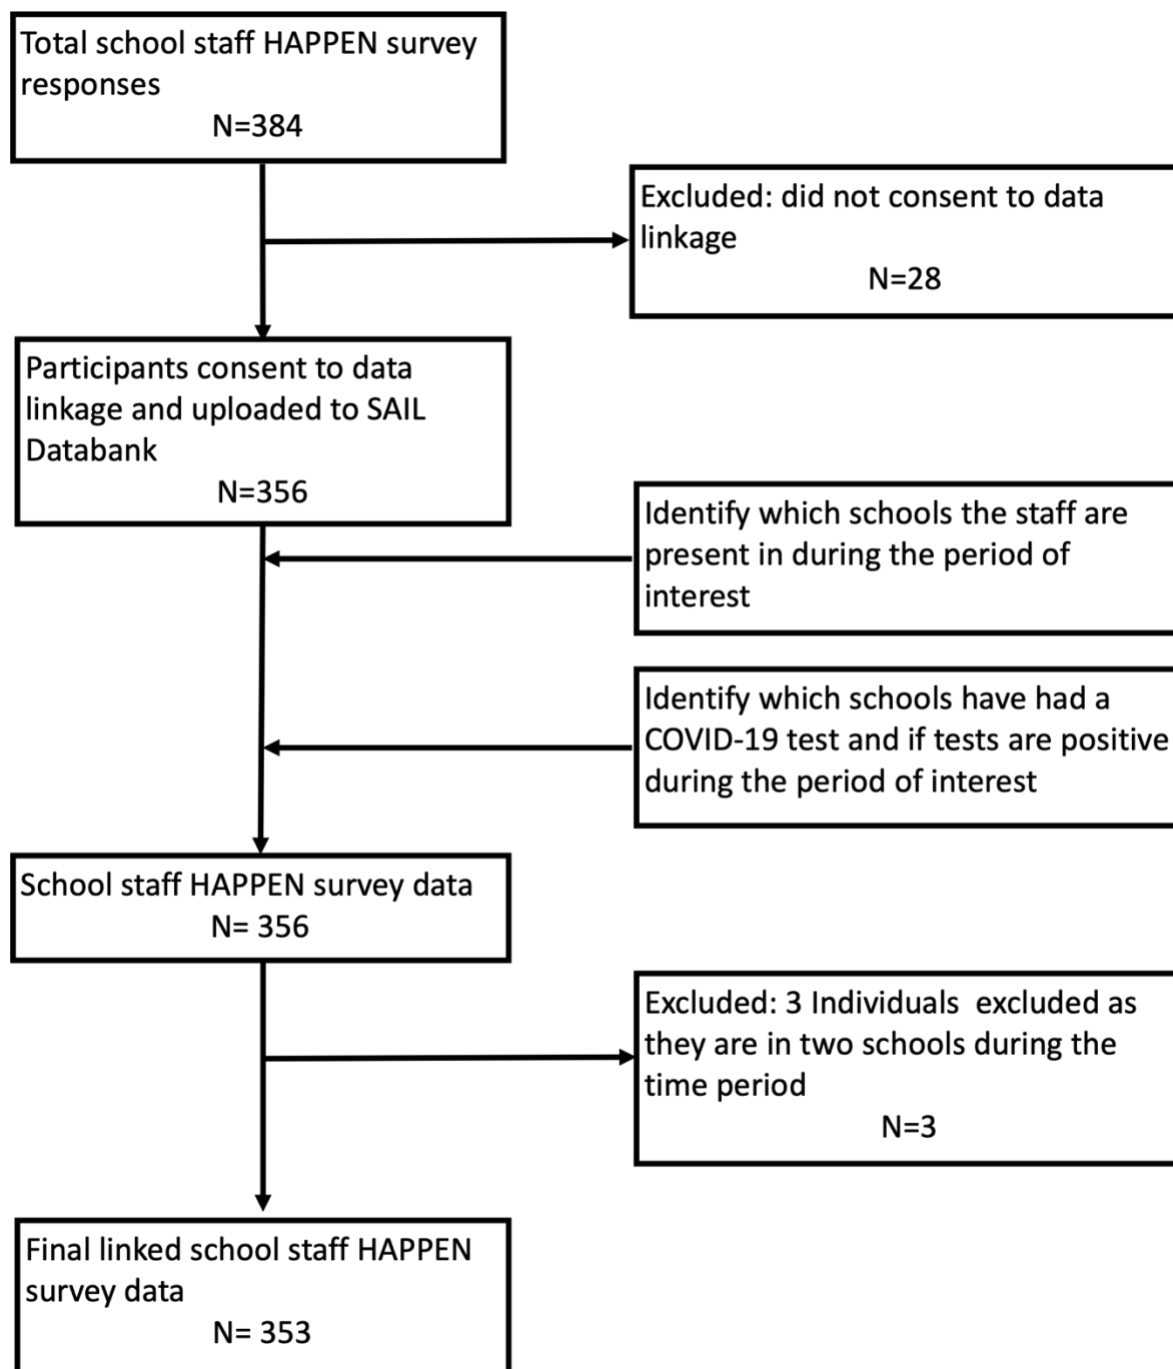

Figure 1: Cohort flow diagram

## Quantitative results

| Characteristics                       | % (n)                         |
|---------------------------------------|-------------------------------|
| Number of participants (school staff) | 353                           |
| Number of schools                     | 59<br>(1,203 national total*) |
| Number of local authorities           | 15                            |

|                                                  | (22 national total*)             |
|--------------------------------------------------|----------------------------------|
| <b>School characteristics</b>                    |                                  |
| <b>Mean Percentage of Free School Meals</b>      | 20.6%<br>(national average 19%*) |
| <b>Free School Meal category</b>                 |                                  |
| <b>0-10%</b>                                     | 28.8% (17)                       |
| <b>11-20%</b>                                    | 25.4% (15)                       |
| <b>21-30%</b>                                    | 23.7% (14)                       |
| <b>31%+</b>                                      | 22.1% (13)                       |
| <b>School size (number of pupils)</b>            | (national average 223*)          |
| <b>0-100</b>                                     | 8.5% (5)                         |
| <b>101-200</b>                                   | 32.2% (19)                       |
| <b>201-300</b>                                   | 23.7% (14)                       |
| <b>301-400</b>                                   | 16.9% (10)                       |
| <b>401-500</b>                                   | 15.3% (9)                        |
| <b>501+</b>                                      | 3.4% (2)                         |
| <b>Participant characteristics</b>               |                                  |
| <b>Job role</b>                                  |                                  |
| <b>Support staff</b>                             | 4.1% (14)                        |
| <b>Supply teacher</b>                            | 1.2% (4)                         |
| <b>Teaching assistant</b>                        | 35.1% (120)                      |
| <b>Teacher</b>                                   | 53.2% (182)                      |
| <b>Headteacher (teaching)</b>                    | 1.2% (4)                         |
| <b>Headteacher (non-teaching)</b>                | 5.3% (18)                        |
| <b>Missing</b>                                   | 3.2% (11)                        |
| <b>Full time</b>                                 | 78.8% (278)                      |
| <b>Part time</b>                                 | 18.4% (65)                       |
| <b>Missing</b>                                   | 2.8% (10)                        |
| <b>Year group</b>                                |                                  |
| <b>Foundation phase (ages 3-7) Reception</b>     | 25.6% (90)                       |
| <b>Key Stage 2 (ages 7-11)</b>                   | 30.0% (106)                      |
| <b>Combination of years</b>                      | 35.7% (126)                      |
| <b>Missing</b>                                   | 8.8% (31)                        |
| <b>Outcomes</b>                                  |                                  |
| <b>Positive COVID-19 school test</b>             | 24.7% (87)                       |
| Missing                                          | 0                                |
| <b>Report cold symptoms previous 7 days</b>      | 8.8% (31)                        |
| Missing                                          | 2.3% (8)                         |
| <b>Report moderate/severe anxiety (GAD-7)</b>    | 17.6% (62)                       |
| Missing                                          | 13.9% (49)                       |
| <b>Report moderate/severe depression (PHQ-9)</b> | 19.0% (67)                       |
| Missing                                          | 35.4% (125)                      |

**Table 1: Demographics of survey respondents; \*obtained from Welsh Government data online [31]**

| Survey item                    | Response                | % (n)       | % (n) of schools with ≥80% agreement of responses (for school-level outcome) |
|--------------------------------|-------------------------|-------------|------------------------------------------------------------------------------|
| Keep 2 metres from pupils      | <i>Never</i>            | 32.0% (113) | 61% (36)                                                                     |
|                                | <i>Rarely</i>           | 35.1% (124) |                                                                              |
|                                | <i>Sometimes</i>        | 23.5% (83)  |                                                                              |
|                                | <i>Most of the time</i> | 7.4% (26)   |                                                                              |
|                                | <i>Always</i>           | (<5)        |                                                                              |
|                                | <i>Missing</i>          | 1.4% (5)    |                                                                              |
| Keep 2 metres from staff       | <i>Never</i>            | (<5)        | 59% (35)                                                                     |
|                                | <i>Rarely</i>           | 8.5% (30)   |                                                                              |
|                                | <i>Sometimes</i>        | 22.1% (78)  |                                                                              |
|                                | <i>Most of the time</i> | 54.7% (193) |                                                                              |
|                                | <i>Always</i>           | 12.2% (43)  |                                                                              |
|                                | <i>Missing</i>          | 2.0% (7)    |                                                                              |
| Wear face covering             | <i>No</i>               | 56.1% (198) | 83% (49)                                                                     |
|                                | <i>Mask</i>             | 31.4% (111) |                                                                              |
|                                | <i>Visor</i>            | 11.3% (40)  |                                                                              |
|                                | <i>Missing</i>          | (<5)        |                                                                              |
| Non-household contacts 1-metre | <i>0</i>                | 24.7% (87)  | 41% (24)                                                                     |
|                                | <i>1-5</i>              | 38.8% (137) |                                                                              |
|                                | <i>6+</i>               | 36.5% (129) |                                                                              |
|                                | <i>Missing</i>          | 0           |                                                                              |
| Non-household contacts direct  | <i>0</i>                | 81.9% (289) | 73% (43)                                                                     |
|                                | <i>1-5</i>              | 8.5% (30)   |                                                                              |
|                                | <i>6+</i>               | 9.6% (34)   |                                                                              |
|                                | <i>Missing</i>          | 0           |                                                                              |

|                                             |                                                         |             |            |
|---------------------------------------------|---------------------------------------------------------|-------------|------------|
| <b>Classes mixing at play</b>               | <b>No</b>                                               | 72.8% (257) | 88% (52)   |
|                                             | <b>Yes – outdoors in a field or large outdoor space</b> | 22.4% (79)  |            |
|                                             | <b>Yes – in the hall</b>                                | 3.7% (13)   |            |
|                                             | <i>Missing</i>                                          | (<5)        |            |
| <b>School offers breakfast club</b>         | <b>No</b>                                               | 36.3% (128) | 95% (56)   |
|                                             | <b>Yes</b>                                              | 58.4% (206) |            |
|                                             | <i>Missing</i>                                          | 5.4% (19)   |            |
| <b>School offers extra-curricular clubs</b> | <b>No</b>                                               | 71.7% (253) | 91% (54)   |
|                                             | <b>Yes</b>                                              | 26.6% (94)  |            |
|                                             | <i>Missing</i>                                          | 1.7% (6)    |            |
| <b>Teaching outdoors</b>                    | <b>Never</b>                                            | 7.1% (25)   | 58.6% (34) |
|                                             | <b>Hardly ever</b>                                      | 18.1% (64)  |            |
|                                             | <b>Some of the time</b>                                 | 61.8% (218) |            |
|                                             | <b>Most of the time</b>                                 | 11.1% (39)  |            |
|                                             | <i>Missing</i>                                          | 2% (7)      |            |

**Table 2: Distribution of individual school staff responses to mitigation survey items and school-level response agreement (see Additional File 3)**

Exposure variables were examined individually (univariable) for association with outcomes (Model 1; Tables 3 and 4) and then all variables were entered together (multivariable) in the final combined models (Model 2; Tables 5 and 6). Models were adjusted for school size and free school meal proportion, and clustered by school (see Additional File 3 for exposure response coding).

### Number of non-household contacts (1-metre, direct)

In the multivariable models, compared to reporting 0 contacts, reporting more non-household direct contacts was associated with higher odds of COVID-19 at the school level (see Table 5), (1-5 contacts OR 2.89 (95% CI: 1.01, 8.31), 6+ contacts OR 1.7 (95% CI: 0.93, 3.1), and a trend to higher general infection (cold symptoms OR 3.09 (95% CI: 0.96, 9.93), see Table 6). Reporting 6 or more contacts within 1-metre was associated with higher depression (OR 2.70 (95% CI: 1.11, 6.56)).

### Face covering

In the univariable model there was evidence that reporting to wear a face covering was associated with an increased odds of a COVID-19 case; OR 2.82 (95% CI: 1.11, 7.14). However, this was not statistically significant in the multivariable model; OR 2.1 (95% CI: 0.87, 5.05). Compared to reporting no face coverings, masks were associated with increased odds of reporting cold symptoms (multivariable model: mask OR 1.98 (95% CI: 1.02, 3.88), see Table 6). Reporting wearing a visor was associated with higher odds of depression (univariable model OR 3.38 (1.31, 8.77), multivariable model OR 4.81 (1.52, 15.22)).

### 2-metre distance from pupils or staff

In the univariable models there were no statistically significant results to support a reduced odds for any of the outcomes when using 2-metre distancing. In the multivariable models we found a trend to an increased odds of a COVID-19 positive test for staff maintaining a 2-metre distance from other staff most of the time/always compared to never/rarely; OR 2.85 (0.97, 8.37).

Classes mixing, breakfast club, extra-curricular clubs and teaching outdoors

There was no significant difference in terms of infection (COVID-19 and cold) or anxiety/depression for staff in schools that allowed classes to mix, offered breakfast or extra-curricular clubs or taught outdoors most of the time.

|                                                                                    | <b>At least one school positive COVID-19 test (pupils and staff) during study period (SAIL) (school-level)</b> |                     |
|------------------------------------------------------------------------------------|----------------------------------------------------------------------------------------------------------------|---------------------|
| <b>Self-reported measures from survey</b>                                          | <b>OR</b>                                                                                                      | <b>95% CI</b>       |
| <i>Face covering: MASK (reference no face covering)</i>                            | <b>2.82</b>                                                                                                    | <b>1.11 to 7.31</b> |
| <i>Face covering: VISOR (reference no face covering)</i>                           | 1.65                                                                                                           | 0.47 to 5.74        |
| <i>Keep 2 metres from PUPILS: SOMETIMES (reference never/rarely)</i>               | 1.01                                                                                                           | 0.50 to 2.02        |
| <i>Keep 2 metres from PUPILS: MOST OF THE TIME/ALWAYS (reference never/rarely)</i> | 0.97                                                                                                           | 0.39 to 2.38        |
| <i>Keep 2 metres from STAFF: SOMETIMES (reference never/rarely)</i>                | 1.58                                                                                                           | 0.47 to 5.32        |
| <i>Keep 2 metres from STAFF: MOST OF THE TIME/ALWAYS (reference never/rarely)</i>  | 2.46                                                                                                           | 0.76 to 7.96        |
| <i>Non-household contacts 1-metre: Up to 5 (reference 0 contacts)</i>              | 0.97                                                                                                           | 0.57 to 1.67        |
| <i>Non-household contacts 1-metre: 6+ (reference 0 contacts)</i>                   | 1.47                                                                                                           | 0.78 to 2.79        |
| <i>Non-household contacts direct: Up to 5 (reference 0 contacts)</i>               | 2.27                                                                                                           | 0.98 to 5.22        |
| <i>Non-household contacts direct: 6+ (reference 0 contacts)</i>                    | 1.58                                                                                                           | 0.86 to 2.89        |
| <i>Classes mix at play (reference no classes mixing)</i>                           | 0.89                                                                                                           | 0.40 to 1.98        |



|                                                                                   |      |              |
|-----------------------------------------------------------------------------------|------|--------------|
| <i>School offers breakfast club (reference no breakfast club)</i>                 | 0.58 | 0.23 to 1.48 |
| <i>School offers extra-curricular clubs (reference no extra-curricular clubs)</i> | 1.67 | 0.73 to 3.86 |
| <i>Teach outdoors: SOMETIMES (reference never/hardly ever)</i>                    | 0.89 | 0.58 to 1.38 |
| <i>Teach outdoors: MOST OF THE TIME/ALWAYS (reference never/hardly ever)</i>      | 0.65 | 0.23 to 1.84 |

**Table 3: Model 1; Univariable logistic regression models of self-reported school-based mitigation measures (survey) and school-level probability of any positive COVID-19 case in school (SAIL). OR: Odds Ratio; 95% CI: 95% confidence intervals; results that are statistically significant with  $p < 0.05$  are highlighted in bold, and  $p < 0.1$  italic; adjusted for school size, proportion of pupils eligible for free school meals, clustered by school. See Additional File 3 for variable codebook.**

|                                                         | Report cold symptoms previous 7 days (individual level: school staff) |              | Moderate/severe anxiety (GAD-7) (individual level: school staff) |              | Moderate/severe depression (PHQ-9) (individual level: school staff) |                     |
|---------------------------------------------------------|-----------------------------------------------------------------------|--------------|------------------------------------------------------------------|--------------|---------------------------------------------------------------------|---------------------|
| Self-reported measures from survey                      | OR                                                                    | 95% CI       | OR                                                               | 95% CI       | OR                                                                  | 95% CI              |
| <i>Face covering: MASK (reference no face covering)</i> | 1.66                                                                  | 0.89 to 3.10 | 1.35                                                             | 0.78 to 2.33 | 1.78                                                                | 0.93 to 3.42        |
| <i>Face covering: VISOR</i>                             | 2.16                                                                  | 0.76 to 6.17 | 2.41                                                             | 0.87 to 6.72 | <b>3.38</b>                                                         | <b>1.31 to 8.77</b> |

|                                                                                 |      |              |      |              |      |              |
|---------------------------------------------------------------------------------|------|--------------|------|--------------|------|--------------|
| <i>(reference no face covering)</i>                                             |      |              |      |              |      |              |
| <b>Keep 2 metres from PUPILS: SOMETIMES (reference never/rarely)</b>            | 0.46 | 0.16 to 0.31 | 0.64 | 0.31 to 1.30 | 1.03 | 0.50 to 2.15 |
| <b>Keep 2 metres from PUPILS: MOST THE TIME/ALWAYS (reference never/rarely)</b> | 0.79 | 0.20 to 3.14 | 2.12 | 0.67 to 6.68 | 1.18 | 0.50 to 2.78 |
| <b>Keep 2 metres from STAFF: SOMETIMES (reference never/rarely)</b>             | 0.66 | 0.16 to 2.76 | 0.50 | 0.14 to 1.76 | 1.26 | 0.29 to 5.36 |
| <b>Keep 2 metres from STAFF: MOST THE TIME/ALWAYS (reference never/rarely)</b>  | 0.57 | 0.20 to 1.60 | 0.63 | 0.21 to 1.91 | 1.05 | 0.28 to 3.97 |
| <b>Non-household contacts 1-5 metre: Up to 5 (reference 0 contacts)</b>         | 0.92 | 0.41 to 2.10 | 0.90 | 0.42 to 1.89 | 1.44 | 0.73 to 2.84 |
| <b>Non-household contacts 1-</b>                                                | 0.85 | 0.30 to 2.46 | 1.31 | 0.59 to 2.88 | 1.65 | 0.76 to 3.59 |

|                                                                                                           |      |                 |      |                 |      |                 |
|-----------------------------------------------------------------------------------------------------------|------|-----------------|------|-----------------|------|-----------------|
| <b><i>metre: 6+<br/>(reference 0<br/>contacts)</i></b>                                                    |      |                 |      |                 |      |                 |
| <b><i>Non-household<br/>contacts direct:<br/>Up to 5<br/>(reference 0<br/>contacts)</i></b>               | 2.53 | 0.85 to<br>7.51 | 0.58 | 0.18 to<br>1.92 | 1.12 | 0.45 to<br>2.77 |
| <b><i>Non-household<br/>contacts direct:<br/>6+ (reference 0<br/>contacts)</i></b>                        | 0.78 | 0.20 to<br>2.97 | 1.59 | 0.47 to<br>5.34 | 1.28 | 0.45 to<br>3.68 |
| <b><i>Classes mix at<br/>play (reference<br/>no classes<br/>mixing)</i></b>                               | 0.49 | 0.19 to<br>1.27 | 0.99 | 0.49 to<br>1.99 | 0.82 | 0.41 to<br>1.64 |
| <b><i>School offers<br/>breakfast club<br/>(reference no<br/>breakfast club)</i></b>                      | 0.98 | 0.46 to<br>2.07 | 0.70 | 0.38 to<br>1.27 | 0.73 | 0.40 to<br>1.34 |
| <b><i>School offers<br/>extra-curricular<br/>clubs (reference<br/>no extra-<br/>curricular clubs)</i></b> | 1.59 | 0.82 to<br>3.10 | 1.22 | 0.50 to<br>2.94 | 1.03 | 0.35 to<br>3.05 |
| <b><i>Teach outdoors:<br/>SOMETIMES<br/>(reference<br/>never/hardly<br/>ever)</i></b>                     | 0.54 | 0.23 to<br>1.26 | 0.65 | 0.34 to<br>1.22 | 0.86 | 0.40 to<br>1.84 |

|                                             |      |         |      |         |      |         |
|---------------------------------------------|------|---------|------|---------|------|---------|
| <b><i>Teach outdoors:</i></b>               | 1.17 | 0.36 to | 0.70 | 0.26 to | 1.84 | 0.56 to |
| <b><i>MOST OF THE TIME/ALWAYS</i></b>       |      | 3.77    |      | 1.87    |      | 6.06    |
| <b><i>(reference never/hardly ever)</i></b> |      |         |      |         |      |         |

**Table 4: Model 1; Univariable logistic regression models of self-reported school-based mitigation measures (survey) and individual level (school staff) self-reported cold symptoms (survey), moderate/severe anxiety and depressive symptoms (survey). OR: Odds Ratio; 95% CI: 95% confidence intervals; results that are statistically significant with  $p < 0.05$  are highlighted in bold, and  $p < 0.1$  italic; adjusted for school size, proportion of pupils eligible for free school meals, clustered by school. See Additional File 3 for variable codebook.**

|                                                                                              | <b>At least one school positive COVID-19 test (pupils and staff) during study period (SAIL) (school-level)</b> |               |
|----------------------------------------------------------------------------------------------|----------------------------------------------------------------------------------------------------------------|---------------|
| <b>Self-reported measures from survey</b>                                                    | <b>OR</b>                                                                                                      | <b>95% CI</b> |
| <b><i>Face covering: MASK</i></b><br><b><i>(reference no face covering)</i></b>              | 2.10                                                                                                           | 0.87 to 5.05  |
| <b><i>Face covering: VISOR</i></b><br><b><i>(reference no face covering)</i></b>             | 1.42                                                                                                           | 0.40 to 5.2   |
| <b><i>Keep 2 metres from PUPILS: SOMETIMES</i></b><br><b><i>(reference never/rarely)</i></b> | 0.79                                                                                                           | 0.36 to 1.75  |

|                                                                                           |      |              |
|-------------------------------------------------------------------------------------------|------|--------------|
| <b><i>Keep 2 metres from PUPILS: MOST OF THE TIME/ALWAYS (reference never/rarely)</i></b> | 0.89 | 0.33 to 2.38 |
| <b><i>Keep 2 metres from STAFF: SOMETIMES (reference never/rarely)</i></b>                | 1.82 | 0.63 to 5.26 |
| <b><i>Keep 2 metres from STAFF: MOST OF THE TIME/ALWAYS (reference never/rarely)</i></b>  | 2.85 | 0.97 to 8.37 |
| <b><i>Non-household contacts 1-metre: Up to 5 (reference 0)</i></b>                       | 0.89 | 0.47 to 1.66 |
| <b><i>Non-household contacts 1-metre: 6+ (reference 0)</i></b>                            | 1.17 | 0.53 to 2.56 |
| <b><i>Non-household contacts direct: Up to 5 (reference 0)</i></b>                        | 2.89 | 1.01 to 8.31 |
| <b><i>Non-household contacts direct: 6+ (reference 0)</i></b>                             | 1.70 | 0.93 to 3.10 |
| <b><i>Classes mix at play</i></b>                                                         | 1.06 | 0.53 to 2.13 |
| <b><i>School offers breakfast club</i></b>                                                | 0.67 | 0.28 to 1.64 |
| <b><i>School offers extra-curricular clubs</i></b>                                        | 1.99 | 0.85 to 4.71 |

|                                                                                          |      |              |
|------------------------------------------------------------------------------------------|------|--------------|
| <i>Teach outdoors:<br/>SOMETIMES (reference<br/>never/hardly ever)</i>                   | 0.88 | 0.52 to 1.47 |
| <i>Teach outdoors: MOST<br/>OF THE TIME/ALWAYS<br/>(reference never/hardly<br/>ever)</i> | 0.45 | 0.11 to 1.81 |

Table 5: Model 2; Multivariable logistic regression model of self-reported school-based exposures and school-level probability of any positive COVID-19 case in school (SAIL). OR: Odds Ratio; 95% CI: 95% confidence intervals; results that are statistically significant with  $p < 0.05$  are highlighted in bold, and  $p < 0.1$  italic; adjusted for school size, proportion of pupils eligible for free school meals, clustered by school. See Additional File 3.

|                                                                      | Cold symptoms<br>previous 7 days<br>(individual level:<br>school staff) |                         | Moderate/severe<br>anxiety (GAD-7)<br>(individual level:<br>school staff) |                 | Moderate/severe<br>depression (PHQ-9)<br>(Individual level:<br>school staff) |                          |
|----------------------------------------------------------------------|-------------------------------------------------------------------------|-------------------------|---------------------------------------------------------------------------|-----------------|------------------------------------------------------------------------------|--------------------------|
| Self-reported<br>measures<br>from survey                             | OR                                                                      | 95% CI                  | OR                                                                        | 95% CI          | OR                                                                           | 95% CI                   |
| <i>Face covering:<br/>MASK<br/>(reference no<br/>face covering)</i>  | <b>1.98</b>                                                             | <b>1.02 to<br/>3.88</b> | 1.10                                                                      | 0.51 to<br>2.39 | 1.70                                                                         | 0.83 to<br>3.48          |
| <i>Face covering:<br/>VISOR<br/>(reference no<br/>face covering)</i> | 2.35                                                                    | 0.81 to<br>6.86         | 2.58                                                                      | 0.82 to<br>8.08 | <b>4.81</b>                                                                  | <b>1.52 to<br/>15.22</b> |
| <i>Keep 2 metres<br/>from PUPILS:</i>                                | 0.50                                                                    | 0.15 to<br>1.62         | 0.62                                                                      | 0.29 to<br>1.35 | 0.97                                                                         | 0.40 to<br>2.36          |

|                                                                                                     |      |                 |      |                 |             |                     |
|-----------------------------------------------------------------------------------------------------|------|-----------------|------|-----------------|-------------|---------------------|
| <b>SOMETIMES</b><br><i>(reference never/rarely)</i>                                                 |      |                 |      |                 |             |                     |
| <b>Keep 2 metres from PUPILS:</b><br><b>MOST THE TIME/ALWAYS</b><br><i>(reference never/rarely)</i> | 0.81 | 0.22 to<br>2.96 | 2.31 | 0.72 to<br>7.35 | 1.95        | 0.61 to<br>6.21     |
| <b>Keep 2 metres from STAFF:</b><br><b>SOMETIMES</b><br><i>(reference never/rarely)</i>             | 0.59 | 0.11 to<br>3.10 | 0.53 | 0.14 to<br>2.06 | 0.68        | 0.13 to<br>3.48     |
| <b>Keep 2 metres from STAFF:</b><br><b>MOST THE TIME/ALWAYS</b><br><i>(reference never/rarely)</i>  | 0.51 | 0.14 to<br>1.81 | 0.77 | 0.21 to<br>2.76 | 0.73        | 0.16 to<br>3.26     |
| <b>Non-household contacts 1-metre: Up to 5</b><br><i>(reference 0)</i>                              | 0.86 | 0.35 to<br>2.09 | 0.85 | 0.39 to<br>1.87 | 1.88        | 0.74 to<br>4.75     |
| <b>Non-household contacts 1-metre: 6+</b><br><i>(reference 0)</i>                                   | 0.68 | 0.16 to<br>2.89 | 1.41 | 0.64 to<br>3.08 | <b>2.70</b> | <b>1.11 to 6.56</b> |

|                                                                              |      |              |      |              |      |              |
|------------------------------------------------------------------------------|------|--------------|------|--------------|------|--------------|
| <b>Non-household contacts direct: Up to 5 (reference 0)</b>                  | 3.09 | 0.96 to 9.93 | 0.62 | 0.18 to 2.13 | 0.90 | 0.27 to 3.00 |
| <b>Non-household contacts direct: 6+ (reference 0)</b>                       | 1.14 | 0.20 to 6.34 | 2.03 | 0.55 to 7.52 | 1.17 | 0.35 to 3.98 |
| <b>Classes mix at play</b>                                                   | 0.53 | 0.22 to 1.28 | 0.93 | 0.43 to 2.02 | 0.82 | 0.30 to 2.22 |
| <b>School offers breakfast club</b>                                          | 1.15 | 0.51 to 2.58 | 0.77 | 0.38 to 1.55 | 0.89 | 0.32 to 2.44 |
| <b>School offers extra-curricular clubs</b>                                  | 1.19 | 0.53 to 2.64 | 1.25 | 0.44 to 3.56 | 0.87 | 0.24 to 3.21 |
| <b>Teach outdoors: SOMETIMES (reference never/hardly ever)</b>               | 0.60 | 0.26 to 1.36 | 0.62 | 0.31 to 1.25 | 0.75 | 0.30 to 1.91 |
| <b>Teach outdoors: MOST OF THE TIME/ALWAYS (reference never/hardly ever)</b> | 0.86 | 0.26 to 2.90 | 0.70 | 0.25 to 1.94 | 1.59 | 0.39 to 6.50 |



**Table 6: Multivariable logistic regression model of self-reported school-based mitigation measures and individual level (school staff) self-reported cold symptoms (survey), moderate/severe anxiety and depressive symptoms (survey). OR: Odds Ratio; 95% CI: 95% confidence intervals; results that are statistically significant with  $p < 0.05$  are highlighted in bold, and  $p < 0.1$  italic; adjusted for school size, proportion of pupils eligible for free school meals, clustered by school. See Additional File 3.**

## Qualitative results

There were 129 responses from primary school staff relating to impacts of wearing face coverings. The final categories conceptualising the impacts of wearing face coverings and frequency counts were; (i) *difficulty being heard/understood – having to talk louder* (n=71); (ii) *difficulty understanding body language/facial expressions* (n=25); (iii) *physical impacts of wearing a face covering including impacts on health and vision* (n=22); (iv) *social/emotional impacts affecting relationships with pupils* (n=12); (v) *challenges for pupils with additional learning needs and English as an additional language* (n=9); and (vi) *impact on teaching phonics* (n=6). In some instances, quotes were coded within multiple categories due to the open-ended nature of the survey question allowing long text responses. A summary of each category is discussed below and additional key quotes are presented in Additional File 5.

### Difficulty being heard/understood – having to talk louder

The most frequent impact of wearing face coverings was the challenge of being heard or understood by pupils. This required staff to have to stand closer to pupils and to raise their voice to be heard. School staff reported that they found it difficult to hear others wearing a mask, and this was a particular issue for staff with hearing problems.

*“Pupils can’t always hear me so I have to lift the visor...when two meters away and talk louder when I am closer to support pupils” (teaching assistant)*

#### Difficulty understanding body language/facial expressions

School staff noted a challenge for pupils in understanding the body language or interpreting facial expressions of adults. This impacted staff in this study to communicate with children and was particularly challenging for younger pupils.

*“I find it extremely difficult to wear a mask/visor whilst teaching. They are young children and need to see facial expressions. It also affects my hearing and their ability to hear me clearly” (teacher)*

#### Physical impacts of wearing a face covering including impacts on health and vision

School staff reported physical impacts and negative complaints including feelings of discomfort. Other common negative effects included their vision, headaches and sore throat. Underlying medical conditions including asthma contributed to challenges experienced by staff with perceived restrictions to breathing.

*“Visors are really difficult, they make me feel enclosed and stressed. The children cannot hear me and the vision is not brilliant either” (teacher)*

### Social/emotional impacts affecting relationships with pupils

Those that wore a face covering and particularly mask use commented on the emotional impact of children not being able to interpret emotions. Staff perceived that this had an impact on their relationship with pupils.

*“Yes, the children would not be able to see my expression, if they are upset they wouldn't be able to see my reaction or compassion” (teaching assistant)*

### Challenges for pupils with additional learning needs and English as an additional language

Additional challenges were presented with supporting children with additional learning needs (ALN) or English as an additional language (EAL), with mask use impacting communication and language development.

*“Yes, it's affecting my teaching. I work with pupils who are learning English as an additional language and they ideally need to be able to see my facial expressions and lip movements in order to help them understand and develop the language themselves” (teacher)*

### Impact on teaching phonics

School staff specifically made references to teaching phonics, including the challenges of teaching reading, writing and language skills. Some felt that face masks restricted modelling of words and demonstrating pronunciation.

*“Pupils in my class have low language development. They need to see my mouth to support the modelling of words and phonics. Greater effort in delivering modelled speech can become tiring very quickly” (teacher)*

## Discussion

This study aims to examine the association of different school-based mitigation measures reported by primary school staff between October to December 2020 on the likelihood of any school-level COVID-19 infection (pupils and staff) at the linked school during this period. This study also examined the association of these measures with individual-level self-reported infection (cold symptoms), anxiety and depression of school staff. Findings suggest that reporting more direct non-household contacts was associated with higher odds of COVID-19 at the school level, and a trend towards self-reported infection. Reporting six or more non-house contacts within 1-metre was also associated with higher depression in school staff. We found no evidence that reporting wearing face coverings or maintaining a 2-metre distance from pupils or other staff during the study period was associated with lower odds of COVID-19 in the linked school setting.

Whilst this observational study offers a real-world evaluation of the school setting, findings highlight the challenge for staff in implementing and adhering to school guidelines. This study assumes that reported measures were in place for the duration of the study period in line with operational guidance issued to schools at that time. However, changes in day-to-day school practice brings methodological challenges of evaluating compliance with and effectiveness of national-level guidance. Our findings of within-school agreement suggests some measures are implemented at a school-level (face coverings, mixing classes at play,

breakfast and extra-curricular clubs). In comparison, agreement of other measures (number of contacts, maintaining 2-metre distance from pupils and staff and teaching outdoors) suggest individual-level influences of adherence to measures, reflecting the challenge of implementing generic guidance in a dynamic school environment.

The finding that reduced contacts may be protective at the school-level is important within the contexts of different settings where the implementation and adherence to different blanket mitigation measures varies. Specifically, this study finds an association between the number of direct physical contacts and increased likelihood of COVID-19 school infections. It is well established that contact patterns of close proximity, prolonged contact and contact frequency are strongly associated with increased risk of transmission [32]. Our finding is consistent with the evidence base regarding contact patterns where reducing number of contacts is associated with a reduction in the basic reproduction number ( $R_0$ ) [33]. As this study suggests variation of school-based mitigation measures between and within-schools, encouraging individual behaviours of school staff such as reducing direct contacts may be of benefit in reducing transmission in the school setting.

Relating to proximity, qualitative findings from this study suggest challenges for staff wearing face coverings including pupils having difficulty hearing and understanding, and this required them to talk louder or move physically closer to pupils to be heard. Research demonstrates that people speak louder when wearing masks [34]. Staff also noted that pupils were unable to interpret facial expressions or emotions, impacting their relationship with pupils and children's perception of compassionate emotions conveyed by staff. Challenges were cited for ALN or EAL pupils particularly regarding speech and language development. As facial expressions and gestures are largely responsible for verbal, non-verbal and emotional

face-to-face communication, face masks may hinder interpersonal communication with pupils [35].

Type of face mask was not captured in this study (e.g. medical/non-medical grade). Guidance to primary schools during the study period (autumn term 2020) did not enforce medical-grade face coverings [36] [9]. The type of face covering worn by staff in this study may include cloth masks which have been found to increase respiratory infection risk due to moisture retention, reuse and poor filtration [37]. This may explain individual-level findings that staff wearing face masks had higher odds of reporting cold symptoms in the previous seven days. In the context of COVID-19 transmission, the main purpose of face coverings is to prevent onward transmission to others as opposed to protecting the individual wearing the face covering [38]. It is possible that asymptomatic transmission from pupils, who were not required to wear face coverings, was regularly occurring to staff within the school regardless of whether staff reported to wear face coverings, and could explain some of the findings in this study. However, it is important to note the many confounding variables of face covering usage that were not measured in this study. This includes background prevalence in the area which may influence wearing face coverings. Evidence suggests that mandating face covering use alone may not increase usage and thus, individual behaviours and other influences are likely to play a role in face covering behaviour [39].

The use of visors was associated with higher anxiety/depression for staff in this study. Impacts on teacher wellbeing have been highlighted in previous research by HAPPEN during school closures and the phased reopening of schools in the summer term of 2020, with primary school staff advocating for their wellbeing to be prioritised [40]. This is important as teacher wellbeing is associated with academic achievement [13]. School staff in the current study also commented on the physical impacts of wearing face coverings, including negatively

affecting their vision, causing headaches and breathing difficulties. Qualitative research exploring face covering behaviour has highlighted the wide range of motivations, including individual and community protection, and barriers such as physical challenges and discomfort [41]. It is possible that the physical discomforts expressed by staff in this study influence face covering behaviour.

We found no evidence in this study that maintaining a 2-metre distance from pupils reduces the odds of a COVID-19 school-level incident. However, few staff were able to achieve this. Research examining the implementation of preventive school-based measures in primary schools in England highlights the challenge of maintaining physical distancing from pupils and the negative impact of distancing measures on teaching including teaching letter formation [10]. This finding is mirrored in the current study, with specific references to the challenges of teaching phonics and those discussed previously. The potential consequences of failing to address these pedagogical impacts include pupils falling further behind in their learning [42].

This study did not find evidence of higher odds of COVID-19 school incidents where children from different classes mix, including breakfast club, extra-curricular clubs and mixing different classes at playtime. School provision during the COVID-19 pandemic encompasses balancing transmission risks against the benefits for children's social and emotional development, wider skill development, educational attainment and reducing inequalities. The COVID-19 pandemic has exacerbated pre-existing inequalities including food insecurity, child poverty and child hunger [43,44] which negatively impact educational attainment [45]. Provision such as breakfast clubs that address socio-economic inequalities are of great public health, education and economic importance and this was reflected in guidance at the time of the study encouraging breakfast clubs [9].

The World Health Organization (WHO), UNICEF and UNESCO recently updated advice to policymakers and educators, issuing a set of risk-based considerations regarding school provision since reopening during the COVID-19 pandemic [46]. Whilst the principles aim to prevent and minimise transmission risks within the school setting, the WHO advocate that at the forefront, educational settings should prioritise “*the continuity of education for children for their overall well-being, health and safety*”, the “*social learning and development of children*” and to consider implications of decisions on school staff. Findings from this study highlight the challenges of evaluating the implementation of guidance and the variation in implementation at an individual and school-level. Governments continually review available evidence to inform risk-based approaches to education delivery that safeguard children’s learning, health and wellbeing and support school staff. This must consider the risk of transmission in addition to the impacts on pupils, teachers and senior school leaders. Finally, both the Welsh and UK governments have recently announced plans to reverse some of these guidelines for schools in the upcoming 2021/22 academic year starting in September 2021. This includes the removal of isolation policies for children in close contact with confirmed cases, removing the use of school ‘bubbles’ to segregate year groups, and face coverings will no longer be recommended.

## Strengths and limitations

All primary schools in Wales (n=1,203) were contacted however the findings in this study are a convenience sample, only representing those that participated and may not be representative of non-participating schools. A range of school-based measures have been implemented and the findings in this study may not encapsulate all approaches. School-based



mitigation measures included in analyses were obtained from a self-report survey and may result in recall bias. This is an observational study and so cannot show cause and effect. As with all observational studies, unmeasured confounders and reverse causality may influence findings, e.g., face covering usage may increase due to a previous COVID-19 case in the school, higher community prevalence and individual behaviours. Thus, face covering use and future COVID-19 cases may be linked by an unmeasured confounder. This study assumed that reported measures were in effect for the duration of the period of study based on national-level guidance issued to schools by the Welsh Government at the start of the autumn term 2020. It is possible that within-schools' day to day practice varied. Despite this, the sample consists of a range of primary school staff including headteachers, teachers and support staff working in schools in 15 of 22 local authorities in Wales, of varying school size and ranges of pupils eligible for free school meals. This study was able to examine all COVID-19 PCR test results in Wales and link these to the relevant school setting and so gives an objective assessment of the association of self-reported adherence to mitigation measures and COVID-19 test positive cases.

## Conclusions

Implementation of COVID-19 mitigation measures was variable and challenging in primary schools in Wales. This study did find evidence that reducing the number of direct non-household contacts is associated with lower risk of COVID-19 in the school and general infection for the individual. This study did not find evidence that face coverings, 2-metre social distancing, stopping children mixing or removing breakfast clubs are associated with fewer

COVID-19 cases in the school or with lower general infection rates and did find evidence that these measures can affect teaching quality.

## List of abbreviations

SAIL Databank: Secure Anonymised Information Linkage

SARS-CoV-2: Severe acute respiratory syndrome coronavirus 2

Polymerase chain reaction: PCR

HAPPEN: Health and Attainment of Pupils in a Primary Education Network

SWAC: School Workforce Annual Census

PLASC: Pupil Level Annual School Census

IGRP: Information Governance Review Panel

GAD-7: Generalized Anxiety Disorder

PHQ-9: Patient Health Questionnaire

ALF: Anonymous Linking Field

OR: Odds Ratio

ALN: Additional learning needs

EAL: English as an additional language

WHO: World Health Organization

## Declarations

### Ethics approval and consent to participate

Ethical approval was granted by the Swansea University Medical School Research Ethics Committee (2017-0033E). To participate in the survey, primary school staff were required to provide written informed consent.

## Consent for publication

Participants provided consent for their data to be published.

## Availability for data and materials

The routine data used in this study are available in the SAIL Databank at Swansea University, Swansea, UK. All proposals to use SAIL data are subject to review by an IGRP. Before any data can be accessed, approval must be given by the IGRP. The IGRP gives careful consideration to each project to ensure proper and appropriate use of SAIL data. When access has been approved, it is gained through a privacy-protecting safe haven and remote access system referred to as the SAIL Gateway. SAIL has established an application process to be followed by anyone who would like to access data via SAIL <https://www.saildatabank.com/application-process> This study has been approved by the IGRP as project 0911.

## Competing interests

The authors declare that they have no competing interests.

## Funding

The Economic and Social Research Council (ESRC) funded the development of the HAPPEN network (grant number: ES/J500197/1) which this research was conducted through. The National Centre for Population Health and Wellbeing Research (NCPHWR) funded by Health and Care Research Wales provided infrastructural support for this work. This work was supported by the Con-COV team funded by the Medical Research Council (grant number: MR/V028367/1). This work was supported by Health Data Research UK, which receives its funding from HDR UK Ltd (HDR-9006) funded by the UK Medical Research Council, Engineering and Physical Sciences Research Council, Economic and Social Research Council, Department of Health and Social Care (England), Chief Scientist Office of the Scottish Government Health and Social Care Directorates, Health and Social Care Research and

Development Division (Welsh Government), Public Health Agency (Northern Ireland), British Heart Foundation (BHF) and the Wellcome Trust. This work was a collaboration with the ADR Wales programme of work. ADR Wales is part of the Economic and Social Research Council (part of UK Research and Innovation) funded ADR UK (grant ES/S007393/1). This work was supported by the Wales COVID-19 Evidence Centre, funded by Health and Care Research Wales.

### Authors' contributions

Emily Marchant: conceptualisation, project administration, data curation, formal analysis, investigation, methodology, writing - original draft, writing - review & editing

Lucy Griffiths: writing - review & editing

Tom Crick: writing - review & editing

Richard Fry: writing - review & editing

Joe Hollinghurst: validation

Michaela James: writing - review & editing

Laura Cowley: writing - review & editing

Hoda Abbasizanjani: writing - review & editing

Dan Thompson: writing - review & editing

Fatemah Torabi: writing - review & editing

Jonathan Kennedy: data curation

Ashley Akbari: writing - review & editing

Michael Gravenor: writing - review & editing

Ronan Lyons: funding acquisition

Sinead Brophy: writing - review & editing, supervision, conceptualization

### Acknowledgements

The authors would like to thank all participating primary schools and school staff that took part in this study. This work was supported by the National Centre for Population Health and

Wellbeing Research through the HAPPEN network. This study makes use of anonymised data held in the Secure Anonymised Information Linkage (SAIL) Databank. We would like to acknowledge all the data providers who make anonymised data available for research.

## References

1. OECD. The state of education - one year into the COVID pandemic [Internet]. 2021 [cited 2021 Jul 28].
2. Sun K, Chen J, Viboud C. Early epidemiological analysis of the coronavirus disease 2019 outbreak based on crowdsourced data: a population-level observational study. *Lancet Digit Heal*. 2020;2(4):e201–8.
3. Cortis D. On Determining the Age Distribution of COVID-19 Pandemic. *Front Public Heal*. 2020;8(202).
4. Viner RM, Mytton OT, Bonell C, Melendez-Torres GJ, Ward J, Hudson L, et al. Susceptibility to SARS-CoV-2 Infection among Children and Adolescents Compared with Adults: A Systematic Review and Meta-analysis. *JAMA Pediatrics*. 2020.
5. Davies NG, Klepac P, Liu Y, Prem K, Jit M, Pearson CAB, et al. Age-dependent effects in the transmission and control of COVID-19 epidemics. *Nat Med*. 2020;26(8):1205–11.
6. Thompson DA, Abbasizanjani H, Fry R, Marchant E, Griffiths L, Akbari A, et al. Staff-pupil SARS-CoV-2 infection pathways in schools in Wales: A population-level linked data approach. *BMJ Paediatr Open* [Internet]. 2021 May 10 [cited 2021 Jun 24];5(1):1049. Available from: [10.1136/bmjpo-2021-001049](https://doi.org/10.1136/bmjpo-2021-001049)
7. Wood R, Thomson E, Galbraith R, Gribben C, Caldwell D, Bishop J, et al. Sharing a household with children and risk of COVID-19: a study of over 300 000 adults living in healthcare worker households in Scotland. *Arch Dis Child* [Internet]. 2021 [cited 2021 Jun 24];0:1–6. Available from: [10.1136/archdischild-2021-321604](https://doi.org/10.1136/archdischild-2021-321604)
8. Office for National Statistics. COVID-19 Schools Infection Survey Round 2, England [Internet]. 2020 [cited 2021 Jun 24].
9. Welsh Government. Operational guidance for schools and settings from the autumn term [Internet]. 2020 [cited 2020 Nov 5].
10. Sundaram N, Bonell C, Ladhani S, Langan SM, Baawuah F, Okike I, et al. Implementation

- of preventive measures to prevent COVID-19: a national study of English primary schools in summer 2020. *Health Educ Res* [Internet]. 2021 Apr 16 [cited 2021 Jun 3]; Available from: [10.1093/her/cyab016](https://doi.org/10.1093/her/cyab016)
11. Krishnaratne S, Pfadenhauer LM, Coenen M, Geffert K, Jung-Sievers C, Klinger C, et al. Measures implemented in the school setting to contain the COVID-19 pandemic: a rapid scoping review. *Cochrane Database Syst Rev* [Internet]. 2020 Dec 17 [cited 2021 Jun 24];2020(12). Available from: [10.1002/14651858.CD013812](https://doi.org/10.1002/14651858.CD013812)
  12. Roffey S. Pupil wellbeing -Teacher wellbeing: Two sides of the same coin? *Educ Child Psychol*. 2012;29(4):8–17.
  13. Briner R, Dewberry C. Staff Wellbeing is the Key to School Success [Internet]. *Worklife Support*. 2007.
  14. Todd, C., Christian, D., Tyler, R., Stratton, G., Brophy S. Developing HAPPEN (Health and Attainment of Pupils involved in a Primary Education Network): working in partnership to improve child health and education. *Perspect Public Health*. 2016;136(3):115–6.
  15. Ford D V., Jones KH, Verplancke JP, Lyons RA, John G, Brown G, et al. The SAIL Databank: Building a national architecture for e-health research and evaluation. *BMC Health Serv Res*. 2009;9(157).
  16. Jones KH, Ford DV, Thompson S, Lyons R. A Profile of the SAIL Databank on the UK Secure Research Platform. *Int J Popul Data Sci* [Internet]. 2019;4(2). Available from: [10.23889/ijpds.v4i2.1134](https://doi.org/10.23889/ijpds.v4i2.1134)
  17. Lyons J, Akbari A, Torabi F, Davies GI, North L, Griffiths R, et al. Understanding and responding to COVID-19 in Wales: protocol for a privacy-protecting data platform for enhanced epidemiology and evaluation of interventions. *BMJ Open* [Internet]. 2020 [cited 2021 Jul 6];10:43010. Available from: [10.1136/bmjopen-2020-043010](https://doi.org/10.1136/bmjopen-2020-043010)
  18. Krippendorff K. *Content Analysis: An Introduction to Its Methodology* [Internet]. 4th ed. SAGE Publications, Inc; 2018 [cited 2021 Jun 24].
  19. Creswell JW, Plano Clark VL. *Designing and Conducting Mixed Methods Research*. SAGE Publications, Inc. 2017;520.
  20. Benchimol EI, Smeeth L, Guttman A, Harron K, Moher D, Petersen I, et al. The REporting of studies Conducted using Observational Routinely-collected health Data (RECORD) Statement. *PLOS Med* [Internet]. 2015 [cited 2021 Jul 29];12(10):e1001885. Available from: [10.1371/JOURNAL.PMED.1001885](https://doi.org/10.1371/JOURNAL.PMED.1001885)

21. Lyons RA, Hutchings H, Rodgers SE, Hyatt MA, Demmler J, Demmler JBJ, Brooks CJ, et al. Development and use of a privacy-protecting total population record linkage system to support observational, interventional, and policy relevant research. *Lancet*. 2012;380(Supplement 3):S6.
22. Spitzer RL, Kroenke K, Williams JBW, Löwe B. A brief measure for assessing generalized anxiety disorder: The GAD-7. *Arch Intern Med [Internet]*. 2006 May 22 [cited 2021 Jun 29];166(10):1092–7. Available from: [10.1001/archinte.166.10.1092](https://doi.org/10.1001/archinte.166.10.1092)
23. Kroenke K, Spitzer RL, Williams JBW. The PHQ-9: Validity of a brief depression severity measure. *J Gen Intern Med [Internet]*. 2001 [cited 2021 Jun 29];16(9):606–13. Available from: [10.1046/j.1525-1497.2001.016009606.x](https://doi.org/10.1046/j.1525-1497.2001.016009606.x)
24. Public Health Wales. Enhanced COVID-19 reporting: Schools and colleges surveillance. 2021 Jun 16 [cited 2021 Jun 23];
25. Elo S, Kyngäs H. The qualitative content analysis process. *J Adv Nurs*. 2008 Apr;62(1):107–15.
26. Neuendorf KA. *The Content Analysis Guidebook*. The Content Analysis Guidebook. SAGE Publications, Inc; 2020.
27. Burnard P. A method of analysing interview transcripts in qualitative research. *Nurse Educ Today*. 1991;11(6):461–6.
28. Morse JM, Field PA. *Qualitative Research Methods for Health Professionals | SAGE Publications Inc [Internet]*. Thousand Oaks, CA: SAGE Publications; 1995 [cited 2021 Jun 24].
29. SAGE. Memos, Memoing In: *The SAGE Encyclopedia of Social Science Research Methods [Internet]*. SAGE Publications Ltd. 2004 [cited 2021 Mar 2]. Available from: [10.4135/9781412950589](https://doi.org/10.4135/9781412950589)
30. Nowell LS, Norris JM, White DE, Moules NJ. Thematic Analysis: Striving to Meet the Trustworthiness Criteria. *Int J Qual Methods*. 2017;
31. Welsh Government. Schools and teachers [Internet]. *StatsWales*. 2021 [cited 2021 Aug 2].
32. Public Health England. Factors contributing to risk of SARS-CoV2 transmission associated with various settings. 2020.
33. Jarvis CI, Van Zandvoort K, Gimma A, Prem K, Klepac P, Rubin GJ, et al. Quantifying the impact of physical distance measures on the transmission of COVID-19 in the UK. *BMC*



- Med 2020 181 [Internet]. 2020 May 7 [cited 2021 Jul 30];18(1):1–10. Available from: 10.1186/S12916-020-01597-8
34. Asadi S, Cappa CD, Barreda S, Wexler AS, Bouvier NM, Ristenpart WD. Efficacy of masks and face coverings in controlling outward aerosol particle emission from expiratory activities. *Sci Rep* [Internet]. 2020 Dec 1 [cited 2021 Jun 22];10(1):1–13. Available from: 10.1038/s41598-020-72798-7
  35. Hotait HY, Fares J, Mheidly N, Fares MY, Zalzale H. Effect of Face Masks on Interpersonal Communication During the COVID-19 Pandemic. *Front Public Heal*. 2020 Dec;8:582191.
  36. Welsh Government. Schools: coronavirus guidance [Internet]. 2021 [cited 2021 Jun 22].
  37. Macintyre R, Seale H, Dung TC, Hien NT, Nga PT, Chughtai AA, et al. A cluster randomised trial of cloth masks compared with medical masks in healthcare workers. *BMJ Open*. 2015;5(e006577).
  38. Health and Safety Executive. Face coverings and face masks during the coronavirus pandemic - HSE [Internet]. 2021 [cited 2021 Jul 28].
  39. Hawkins JB, Astley CM, Brownstein JS, Chen J, Brilliant MBA J, Cohen JM, et al. Mask-wearing and control of SARS-CoV-2 transmission in the USA: a cross-sectional study. *Artic Lancet Digit Heal* [Internet]. 2021 [cited 2021 Jul 30];3:148–57. Available from: 10.1016/S2589-7500(20)30293-4
  40. Marchant E, Todd C, James M, Crick T, Dwyer R, Brophy S. Primary school staff reflections on school closures due to COVID-19 and recommendations for the future: A national qualitative survey [Internet]. *medRxiv*. medRxiv; 2020 [cited 2021 Mar 9]. p. 2020.11.06.20227108. Available from: 10.1101/2020.11.06.20227108
  41. VS S, SC F, AJ L, ICA H, M P, APC R, et al. Motivations and Barriers for the Use of Face Coverings during the COVID-19 Pandemic: Messaging Insights from Focus Groups. *Int J Environ Res Public Health* [Internet]. 2020 Dec 2 [cited 2021 Jul 30];17(24):1–12. Available from: 10.3390/IJERPH17249298
  42. Sharp C, Nelson J, Lucas M, Julius J, Mccrone T, Sims D. Schools' responses to COVID-19: The challenges facing schools and pupils in September 2020 [Internet]. 2020 [cited 2021 Jun 25].
  43. Power M, Doherty B, Pybus KJ, Pickett KE. How COVID-19 has exposed inequalities in

- the UK food system: The case of UK food and poverty [version 2; peer review: 5 approved]. Emerald Open Res [Internet]. 2020 [cited 2021 Jun 22];2(11). Available from: [10.35241/emeraldopenres.13539.1](https://doi.org/10.35241/emeraldopenres.13539.1)
44. Whitehead M, Taylor-Robinson D, Barr B. Poverty, health, and covid-19. BMJ [Internet]. 2021 Feb 12 [cited 2021 Jun 24];372. Available from: [10.1136/bmj.n376](https://doi.org/10.1136/bmj.n376)
45. Jyoti DF, Frongillo EA, Jones SJ. Food insecurity affects school children’s academic performance, weight gain, and social skills. J Nutr [Internet]. 2005 Dec 1 [cited 2021 Jun 22];135(12):2831–9. Available from: [10.1093/jn/135.12.2831](https://doi.org/10.1093/jn/135.12.2831)
46. World Health Organization. Considerations for school-related public health measures in the context of COVID-19 [Internet]. 2020 Sep [cited 2021 Jun 23].
